# Supplementary material for: Acoustic crypsis in communication by North Atlantic right whale mother–calf pairs on the calving grounds
Source: Biol Lett. 2019 Oct 9;15(10):20190485. doi: 10.1098/rsbl.2019.0485 (PMC6832179; doi:10.1098/rsbl.2019.0485)
Supplement: CallVars.xlsx [file rsbl20190485supp2.xlsx]

## Sheet: CallVars_revised
Parks, Cusano, Van Parijs, Nowacek (2019) "Acoustic crypsis in communication by North Atlantic right whale mother-calf pairs on the calving grounds" Published in Biology Letters	year	ID	mc	callclass	calltype	amplitude	rmsRL	SNR	NL
	2006	EG06_021a	N	Tonal	Hybrid	high	144	35	109
	2006	EG06_021a	N	Tonal	Hybrid	high	140	31	109
	2006	EG06_021a	N	Tonal	Hybrid	high	136	31	105
	2006	EG06_021a	N	Tonal	LowTonal	high	143	37	106
	2006	EG06_021a	N	Tonal	LowTonal	high	148	43	105
	2006	EG06_021a	N	Tonal	LowTonal	high	136	31	105
	2006	EG06_021a	N	Tonal	LowTonal	high	145	32	113
	2006	EG06_021a	N	Tonal	LowTonal	high	151	40	111
	2006	EG06_021a	N	Tonal	LowTonal	high	142	28	114
	2006	EG06_021a	N	Tonal	LowTonal	high	146	34	112
	2006	EG06_021a	N	Tonal	LowTonal	high	145	37	108
	2006	EG06_021a	N	Tonal	LowTonal	high	145	40	105
	2006	EG06_021a	N	Tonal	LowTonal	high	150	44	106
	2006	EG06_021a	N	Tonal	LowTonal	high	153	47	106
	2006	EG06_021a	N	Tonal	LowTonal	high	147	41	106
	2006	EG06_021a	N	Tonal	LowTonal	high	149	46	103
	2006	EG06_021a	N	Tonal	LowTonal	high	143	39	104
	2006	EG06_021a	N	Tonal	LowTonal	high	139	34	105
	2006	EG06_021a	N	Tonal	LowTonal	high	147	43	104
	2006	EG06_021a	N	Tonal	LowTonal	high	148	44	104
	2006	EG06_021a	N	Tonal	Upcall	high	148	36	112
	2006	EG06_021a	N	Tonal	Upcall	high	146	37	109
	2006	EG06_021a	N	Tonal	Upcall	low	108	4	106
	2006	EG06_021a	N	Tonal	Upcall	low	113	7	107
	2006	EG06_021a	N	Tonal	Upcall	high	144	38	106
	2006	EG06_021a	N	Tonal	Upcall	high	146	29	117
	2006	EG06_021a	N	Tonal	Upcall	high	139	26	113
	2006	EG06_021a	N	Tonal	Upcall	high	145	31	114
	2006	EG06_021a	N	Tonal	Upcall	high	149	40	109
	2006	EG06_021a	N	Tonal	Upcall	high	149	44	105
	2006	EG06_021a	N	Pulsed	Pulsive	high	151	35	116
	2006	EG06_021a	N	Pulsed	Pulsive	high	151	41	110
	2006	EG06_021a	N	Pulsed	Pulsive	high	149	41	108
	2006	EG06_021a	N	Pulsed	Pulsive	high	147	43	104
	2006	EG06_024e	N	Tonal	HighTonal	low	118	21	97
	2006	EG06_024e	N	Tonal	HighTonal	low	113	15	98
	2006	EG06_024e	N	Tonal	HighTonal	low	120	23	97
	2006	EG06_024e	N	Tonal	HighTonal	low	115	18	97
	2006	EG06_024e	N	Tonal	HighTonal	low	121	23	98
	2006	EG06_024e	N	Tonal	HighTonal	low	124	26	98
	2006	EG06_024e	N	Tonal	Hybrid	low	123	25	98
	2006	EG06_024e	N	Tonal	Hybrid	low	125	15	110
	2006	EG06_024e	N	Tonal	Hybrid	low	131	21	110
	2006	EG06_024e	N	Tonal	Hybrid	low	118	21	97
	2006	EG06_024e	N	Tonal	Hybrid	low	121	18	103
	2006	EG06_024e	N	Tonal	Hybrid	low	129	27	102
	2006	EG06_024e	N	Tonal	Hybrid	low	131	28	103
	2006	EG06_024e	N	Tonal	Hybrid	low	131	33	98
	2006	EG06_024e	N	Tonal	Hybrid	high	133	35	98
	2006	EG06_024e	N	Tonal	Upcall	low	128	25	103
	2006	EG06_024e	N	Tonal	Upcall	low	131	28	103
	2006	EG06_024e	N	Pulsed	Pulsive	high	134	33	101
	2006	EG06_024e	N	Pulsed	Pulsive	high	133	37	96
	2006	EG06_024e	N	Pulsed	Pulsive	high	141	44	97
	2006	EG06_024e	N	Pulsed	Pulsive	high	139	39	100
	2006	EG06_024e	N	Pulsed	Pulsive	high	134	31	103
	2006	EG06_024e	N	Pulsed	Pulsive	high	136	34	102
	2006	EG06_024e	N	Pulsed	Pulsive	low	125	25	100
	2006	EG06_024e	N	Pulsed	Pulsive	high	140	39	101
	2006	EG06_024e	N	Pulsed	Pulsive	low	128	27	101
	2006	EG06_024e	N	Pulsed	Pulsive	high	141	33	108
	2006	EG06_024e	N	Pulsed	Pulsive	high	139	36	103
	2006	EG06_024e	N	Pulsed	Pulsive	low	125	28	97
	2006	EG06_028a	N	Tonal	LowTonal	high	148	18	130
	2014	EG14_040a	Y	Tonal	LowTonal	low	124	19	105
	2014	EG14_040a	Y	Tonal	LowTonal	high	138	14	124
	2014	EG14_040a	Y	Tonal	LowTonal	high	141	17	124
	2014	EG14_040a	Y	Tonal	Upcall	high	140	15	125
	2014	EG14_040a	Y	Tonal	Upcall	high	149	25	124
	2014	EG14_040a	Y	Tonal	Upcall	high	143	21	122
	2014	EG14_040a	Y	Tonal	Upcall	high	149	28	121
	2014	EG14_040a	Y	Tonal	Upcall	high	141	22	119
	2014	EG14_040a	Y	Tonal	Upcall	high	144	31	113
	2014	EG14_040a	Y	Pulsed	Pulsive	high	142	29	113
	2014	EG14_040a	Y	Pulsed	Pulsive	high	151	36	115
	2014	EG14_040a	Y	Pulsed	Pulsive	high	147	34	113
	2014	EG14_040a	Y	Pulsed	Pulsive	high	149	37	112
	2014	EG14_040a	Y	Pulsed	SinglePulse	high	146	35	111
	2014	EG14_041a	Y	Tonal	Upcall	low	122	21	101
	2014	EG14_041a	Y	Tonal	Upcall	low	131	28	103
	2014	EG14_041a	Y	Tonal	Upcall	low	122	21	101
	2014	EG14_041a	Y	Tonal	Upcall	low	126	25	101
	2014	EG14_041a	Y	Tonal	Upcall	low	124	13	111
	2014	EG14_041a	Y	Tonal	Upcall	low	125	11	114
	2014	EG14_041a	Y	Calf	Calf	low	123	16	107
	2014	EG14_041a	Y	Calf	Calf	low	122	13	109
	2014	EG14_041a	Y	Calf	Calf	low	117	9	108
	2014	EG14_041a	Y	Calf	Calf	low	118	7	112
	2014	EG14_041a	Y	Calf	Calf	low	113	3	113
	2014	EG14_041a	Y	Calf	Calf	low	127	4	125
	2014	EG14_041a	Y	Calf	Calf	low	120	1	125
	2014	EG14_041a	Y	Calf	Calf	high	134	13	121
	2014	EG14_041a	Y	Calf	Calf	low	131	6	126
	2014	EG14_041a	Y	Calf	Calf	high	140	13	127
	2014	EG14_041a	Y	Calf	Calf	low	123	5	120
	2014	EG14_041a	Y	Calf	Calf	low	116	2	118
	2014	EG14_041a	Y	Calf	Calf	low	127	10	117
	2014	EG14_041a	Y	Calf	Calf	low	128	12	116
	2014	EG14_041a	Y	Calf	Calf	low	125	10	115
	2014	EG14_041a	Y	Calf	Calf	low	122	7	116
	2014	EG14_041a	Y	Calf	Calf	high	134	10	124
	2014	EG14_041a	Y	Calf	Calf	high	139	15	124
	2014	EG14_041a	Y	Calf	Calf	high	136	20	116
	2014	EG14_041a	Y	Calf	Calf	high	134	22	112
	2014	EG14_041a	Y	Calf	Calf	low	125	13	112
	2014	EG14_041a	Y	Calf	Calf	low	129	17	112
	2014	EG14_041a	Y	Calf	Calf	low	124	11	113
	2014	EG14_041a	Y	Calf	Calf	low	127	2	129
	2014	EG14_041a	Y	Calf	Calf	low	131	7	125
	2014	EG14_041a	Y	Calf	Calf	low	131	13	118
	2014	EG14_041a	Y	Calf	Calf	low	131	16	115
	2014	EG14_041a	Y	Calf	Calf	low	126	11	115
	2014	EG14_041a	Y	Calf	Calf	low	126	13	113
	2014	EG14_041a	Y	Calf	Calf	low	122	3	122
	2014	EG14_041a	Y	Calf	Calf	low	125	8	118
	2014	EG14_041a	Y	Calf	Calf	low	121	6	116
	2014	EG14_041a	Y	Calf	Calf	high	134	11	123
	2014	EG14_041a	Y	Calf	Calf	low	130	7	124
	2014	EG14_041a	Y	Calf	Calf	low	123	7	117
	2014	EG14_041a	Y	Calf	Calf	low	127	14	113
	2014	EG14_041a	Y	Calf	Calf	low	128	4	126
	2014	EG14_041a	Y	Calf	Calf	low	124	2	126
	2014	EG14_041a	Y	Calf	Calf	low	130	5	127
	2014	EG14_041a	Y	Calf	Calf	low	125	10	115
	2014	EG14_041a	Y	Calf	Calf	low	131	16	115
	2014	EG14_041a	Y	Calf	Calf	low	128	21	107
	2014	EG14_041a	Y	Calf	Calf	low	129	8	122
	2014	EG14_041a	Y	Calf	Calf	low	113	0	129
	2014	EG14_041a	Y	Calf	Calf	high	132	5	129
	2014	EG14_041a	Y	Pulsed	DoublePulse	low	122	7	116
	2014	EG14_041a	Y	Pulsed	DoublePulse	low	112	3	112
	2014	EG14_041a	Y	Pulsed	Pulsive	low	118	6	113
	2014	EG14_041a	Y	Pulsed	Pulsive	low	114	4	112
	2014	EG14_041a	Y	Pulsed	Pulsive	low	124	14	110
	2014	EG14_041a	Y	Pulsed	Pulsive	low	114	5	111
	2014	EG14_041a	Y	Pulsed	SinglePulse	low	128	21	107
	2014	EG14_041a	Y	Pulsed	SinglePulse	low	130	22	108
	2014	EG14_041a	Y	Pulsed	SinglePulse	low	123	14	109
	2014	EG14_041a	Y	Pulsed	SinglePulse	low	114	11	103
	2014	EG14_041a	Y	Pulsed	SinglePulse	low	103	3	103
	2014	EG14_041a	Y	Pulsed	SinglePulse	low	109	8	102
	2014	EG14_041a	Y	Pulsed	SinglePulse	low	110	8	103
	2014	EG14_041a	Y	Pulsed	SinglePulse	low	115	10	105
	2014	EG14_041a	Y	Pulsed	SinglePulse	low	113	11	102
	2014	EG14_041a	Y	Pulsed	SinglePulse	low	118	13	105
	2014	EG14_041a	Y	Pulsed	SinglePulse	low	114	10	104
	2014	EG14_041a	Y	Pulsed	SinglePulse	low	113	12	101
	2014	EG14_041a	Y	Pulsed	SinglePulse	low	114	11	103
	2014	EG14_041a	Y	Pulsed	SinglePulse	low	119	18	101
	2014	EG14_041a	Y	Pulsed	SinglePulse	low	116	11	105
	2014	EG14_041a	Y	Pulsed	SinglePulse	low	108	7	102
	2014	EG14_041a	Y	Pulsed	SinglePulse	low	108	7	102
	2014	EG14_049a	Y	Pulsed	DoublePulse	low	116	7	110
	2014	EG14_049a	Y	Pulsed	DoublePulse	low	113	3	113
	2014	EG14_049a	Y	Pulsed	DoublePulse	low	117	6	112
	2014	EG14_049a	Y	Pulsed	DoublePulse	low	119	7	113
	2014	EG14_049a	Y	Pulsed	DoublePulse	low	116	5	113
	2014	EG14_049a	Y	Pulsed	DoublePulse	low	128	18	110
	2014	EG14_049a	Y	Pulsed	DoublePulse	low	123	4	121
	2014	EG14_049a	Y	Pulsed	Pulsive	low	118	3	118
	2014	EG14_049a	Y	Pulsed	Pulsive	high	134	15	119
	2014	EG14_049a	Y	Pulsed	SinglePulse	low	121	3	121
	2014	EG14_049a	Y	Pulsed	SinglePulse	low	119	3	119
	2014	EG14_049a	Y	Pulsed	SinglePulse	low	125	7	119
	2014	EG14_049a	Y	Pulsed	SinglePulse	low	118	4	116
	2014	EG14_049a	Y	Pulsed	SinglePulse	low	118	7	112
	2014	EG14_049a	Y	Pulsed	SinglePulse	low	125	9	116
	2014	EG14_049a	Y	Pulsed	SinglePulse	low	125	9	116
	2014	EG14_049a	Y	Pulsed	SinglePulse	low	121	3	121
	2014	EG14_049a	Y	Pulsed	SinglePulse	low	118	3	118
	2014	EG14_049a	Y	Pulsed	SinglePulse	low	114	4	112
	2014	EG14_049a	Y	Pulsed	SinglePulse	low	120	6	115
	2014	EG14_049a	Y	Pulsed	SinglePulse	low	129	11	118
	2014	EG14_049a	Y	Pulsed	SinglePulse	low	121	6	116
	2014	EG14_049a	Y	Pulsed	SinglePulse	low	126	12	114
	2014	EG14_049a	Y	Pulsed	SinglePulse	low	117	4	115
	2014	EG14_049a	Y	Pulsed	SinglePulse	low	117	3	117
	2014	EG14_049a	Y	Pulsed	SinglePulse	low	120	14	106
	2014	EG14_049a	Y	Pulsed	SinglePulse	low	130	3	130
	2014	EG14_049a	Y	Pulsed	SinglePulse	low	130	4	128
	2014	EG14_049a	Y	Pulsed	SinglePulse	low	127	2	129
	2014	EG14_049a	Y	Pulsed	SinglePulse	low	127	3	127
	2014	EG14_049a	Y	Pulsed	SinglePulse	low	127	2	129
	2014	EG14_049a	Y	Pulsed	SinglePulse	low	128	3	128
	2014	EG14_049a	Y	Pulsed	SinglePulse	low	117	-1	124
	2014	EG14_049a	Y	Pulsed	SinglePulse	low	130	5	127
	2014	EG14_049a	Y	Pulsed	SinglePulse	low	129	5	126
	2014	EG14_049a	Y	Pulsed	SinglePulse	low	121	22	99
	2014	EG14_049a	Y	Pulsed	SinglePulse	low	125	14	111
	2014	EG14_049a	Y	Pulsed	SinglePulse	low	129	10	119
	2014	EG14_049a	Y	Pulsed	SinglePulse	low	126	20	106
	2014	EG14_049a	Y	Pulsed	SinglePulse	low	123	17	106
	2014	EG14_049a	Y	Pulsed	SinglePulse	high	132	27	105
	2014	EG14_049a	Y	Pulsed	SinglePulse	low	128	22	106
	2014	EG14_049a	Y	Pulsed	SinglePulse	low	122	13	109
	2014	EG14_049a	Y	Pulsed	SinglePulse	low	124	7	118
	2014	EG14_049a	Y	Pulsed	SinglePulse	low	119	2	121
	2014	EG14_049a	Y	Pulsed	SinglePulse	low	122	6	117
	2014	EG14_049a	Y	Pulsed	SinglePulse	low	116	2	118
	2014	EG14_049a	Y	Pulsed	SinglePulse	low	122	8	115
	2014	EG14_049a	Y	Pulsed	SinglePulse	low	124	8	117
	2014	EG14_049a	Y	Pulsed	SinglePulse	low	118	5	115
	2014	EG14_056a	Y	Pulsed	DoublePulse	low	129	8	122
	2014	EG14_056a	Y	Pulsed	DoublePulse	low	119	2	121
	2014	EG14_056a	Y	Pulsed	Pulsive	low	121	3	121
	2014	EG14_056a	Y	Pulsed	Pulsive	low	120	2	122
	2014	EG14_056a	Y	Pulsed	Pulsive	low	122	14	108
	2014	EG14_056a	Y	Pulsed	Pulsive	low	117	2	119
	2014	EG14_056a	Y	Pulsed	Pulsive	low	117	1	122
	2014	EG14_056a	Y	Pulsed	Pulsive	low	120	13	107
	2014	EG14_056a	Y	Pulsed	Pulsive	low	121	18	103
	2014	EG14_056a	Y	Pulsed	SinglePulse	low	111	10	101
	2014	EG14_056a	Y	Pulsed	SinglePulse	low	126	12	114
	2014	EG14_056a	Y	Pulsed	SinglePulse	low	114	2	116
	2014	EG14_056a	Y	Pulsed	SinglePulse	low	129	19	110
	2014	EG14_056a	Y	Pulsed	SinglePulse	low	118	13	105
	2014	EG14_056a	Y	Pulsed	SinglePulse	low	126	22	104
	2014	EG14_056a	Y	Pulsed	SinglePulse	low	111	2	113
	2014	EG14_056a	Y	Pulsed	SinglePulse	low	118	6	113
	2014	EG14_056a	Y	Pulsed	SinglePulse	low	120	10	110
	2015	EG15_052a	Y	Pulsed	DoublePulse	low	124	21	103
	2015	EG15_052a	Y	Pulsed	DoublePulse	low	112	12	100
	2015	EG15_052a	Y	Pulsed	DoublePulse	low	123	13	110
	2015	EG15_052a	Y	Pulsed	DoublePulse	low	100	1	105
	2015	EG15_052a	Y	Pulsed	DoublePulse	low	117	16	101
	2015	EG15_052a	Y	Pulsed	DoublePulse	low	114	13	101
	2015	EG15_052a	Y	Pulsed	DoublePulse	low	114	2	116
	2015	EG15_052a	Y	Pulsed	DoublePulse	low	121	5	118
	2015	EG15_052a	Y	Pulsed	DoublePulse	low	115	9	106
	2015	EG15_052a	Y	Pulsed	DoublePulse	low	119	4	117
	2015	EG15_052a	Y	Pulsed	DoublePulse	low	121	15	106
	2015	EG15_052a	Y	Pulsed	DoublePulse	low	112	9	103
	2015	EG15_052a	Y	Pulsed	DoublePulse	low	131	33	98
	2015	EG15_052a	Y	Pulsed	DoublePulse	low	110	3	110
	2015	EG15_052a	Y	Pulsed	DoublePulse	low	105	7	99
	2015	EG15_052a	Y	Pulsed	DoublePulse	low	108	7	102
	2015	EG15_052a	Y	Pulsed	DoublePulse	low	115	8	108
	2015	EG15_052a	Y	Pulsed	DoublePulse	low	106	3	106
	2015	EG15_052a	Y	Pulsed	DoublePulse	low	116	11	105
	2015	EG15_052a	Y	Pulsed	DoublePulse	low	109	2	111
	2015	EG15_052a	Y	Pulsed	DoublePulse	low	111	4	109
	2015	EG15_052a	Y	Pulsed	DoublePulse	low	100	6	95
	2015	EG15_052a	Y	Pulsed	DoublePulse	low	112	9	103
	2015	EG15_052a	Y	Pulsed	DoublePulse	low	111	15	96
	2015	EG15_052a	Y	Pulsed	DoublePulse	low	111	2	113
	2015	EG15_052a	Y	Pulsed	Pulsive	low	120	6	115
	2015	EG15_052a	Y	Pulsed	Pulsive	low	119	4	117
	2015	EG15_052a	Y	Pulsed	Pulsive	low	116	3	116
	2015	EG15_052a	Y	Pulsed	Pulsive	low	121	5	118
	2015	EG15_052a	Y	Pulsed	Pulsive	low	123	6	118
	2015	EG15_052a	Y	Pulsed	Pulsive	low	121	14	107
	2015	EG15_052a	Y	Pulsed	Pulsive	low	107	8	100
	2015	EG15_052a	Y	Pulsed	Pulsive	low	104	4	102
	2015	EG15_052a	Y	Pulsed	Pulsive	low	115	10	105
	2015	EG15_052a	Y	Pulsed	Pulsive	low	106	6	101
	2015	EG15_052a	Y	Pulsed	Pulsive	low	112	11	101
	2015	EG15_052a	Y	Pulsed	Pulsive	low	113	9	104
	2015	EG15_052a	Y	Pulsed	SinglePulse	low	107	10	97
	2015	EG15_052a	Y	Pulsed	SinglePulse	low	106	10	96
	2015	EG15_052a	Y	Pulsed	SinglePulse	low	100	6	95
	2015	EG15_052a	Y	Pulsed	SinglePulse	low	111	12	99
	2015	EG15_052a	Y	Pulsed	SinglePulse	low	119	24	95
	2015	EG15_052a	Y	Pulsed	SinglePulse	low	108	8	101
	2015	EG15_052a	Y	Pulsed	SinglePulse	low	111	8	104
	2015	EG15_052a	Y	Pulsed	SinglePulse	low	108	6	103
	2015	EG15_052a	Y	Pulsed	SinglePulse	low	107	7	101
	2015	EG15_052a	Y	Pulsed	SinglePulse	low	106	7	100
	2015	EG15_052a	Y	Pulsed	SinglePulse	low	103	5	100
	2015	EG15_052a	Y	Pulsed	SinglePulse	low	110	9	101
	2015	EG15_052a	Y	Pulsed	SinglePulse	low	110	9	101
	2015	EG15_052a	Y	Pulsed	SinglePulse	low	104	8	97
	2015	EG15_052a	Y	Pulsed	SinglePulse	low	107	7	101
	2015	EG15_052a	Y	Pulsed	SinglePulse	low	106	8	99
	2015	EG15_052a	Y	Pulsed	SinglePulse	low	113	7	107
	2015	EG15_052a	Y	Pulsed	SinglePulse	low	102	4	100
	2015	EG15_052a	Y	Pulsed	SinglePulse	low	97	3	97
	2015	EG15_052a	Y	Pulsed	SinglePulse	low	102	5	99
	2015	EG15_052a	Y	Pulsed	SinglePulse	low	110	4	108
	2015	EG15_052a	Y	Pulsed	SinglePulse	low	112	7	106
	2015	EG15_052a	Y	Pulsed	SinglePulse	low	113	7	107
	2015	EG15_052a	Y	Pulsed	SinglePulse	low	117	14	103
	2015	EG15_052a	Y	Pulsed	SinglePulse	low	113	5	110
	2015	EG15_052a	Y	Pulsed	SinglePulse	low	112	9	103
	2015	EG15_052a	Y	Pulsed	SinglePulse	low	117	16	101
	2015	EG15_052a	Y	Pulsed	SinglePulse	low	120	17	103
	2015	EG15_052a	Y	Pulsed	SinglePulse	low	113	16	97
	2015	EG15_052a	Y	Pulsed	SinglePulse	low	117	21	96
	2015	EG15_052a	Y	Pulsed	SinglePulse	low	111	16	95
	2015	EG15_052a	Y	Pulsed	SinglePulse	low	119	9	110
	2015	EG15_052a	Y	Pulsed	SinglePulse	low	115	7	109
	2015	EG15_052a	Y	Pulsed	SinglePulse	low	118	9	109
	2015	EG15_052a	Y	Pulsed	SinglePulse	low	119	11	108
	2015	EG15_052a	Y	Pulsed	SinglePulse	low	112	7	106
	2015	EG15_052a	Y	Pulsed	SinglePulse	low	118	13	105
	2015	EG15_052a	Y	Pulsed	SinglePulse	low	117	14	103
	2015	EG15_052a	Y	Pulsed	SinglePulse	low	114	10	104
	2015	EG15_052a	Y	Pulsed	SinglePulse	low	111	4	109
	2015	EG15_052a	Y	Pulsed	SinglePulse	low	104	1	109
	2015	EG15_052a	Y	Pulsed	SinglePulse	low	107	3	107
	2015	EG15_052a	Y	Pulsed	SinglePulse	low	121	15	106
	2015	EG15_052a	Y	Pulsed	SinglePulse	low	119	15	104
	2015	EG15_052a	Y	Pulsed	SinglePulse	low	116	10	106
	2015	EG15_052a	Y	Pulsed	SinglePulse	low	108	1	113
	2015	EG15_052a	Y	Pulsed	SinglePulse	low	118	17	101
	2015	EG15_052a	Y	Pulsed	SinglePulse	low	113	11	102
	2015	EG15_052a	Y	Pulsed	SinglePulse	low	111	10	101
	2015	EG15_052a	Y	Pulsed	SinglePulse	low	120	8	113
	2015	EG15_052a	Y	Pulsed	SinglePulse	low	128	19	109
	2015	EG15_052a	Y	Pulsed	SinglePulse	high	132	19	113
	2015	EG15_052a	Y	Pulsed	SinglePulse	low	122	8	115
	2015	EG15_052a	Y	Pulsed	SinglePulse	low	114	5	111
	2015	EG15_052a	Y	Pulsed	SinglePulse	low	121	12	109
	2015	EG15_052a	Y	Pulsed	SinglePulse	low	109	12	97
	2015	EG15_052a	Y	Pulsed	SinglePulse	low	110	11	99
	2015	EG15_052a	Y	Pulsed	SinglePulse	low	109	4	107
	2015	EG15_052a	Y	Pulsed	SinglePulse	low	112	8	105
	2015	EG15_052a	Y	Pulsed	SinglePulse	low	106	6	101
	2015	EG15_052a	Y	Pulsed	SinglePulse	low	104	3	104
	2015	EG15_052a	Y	Pulsed	SinglePulse	low	110	12	98
	2015	EG15_052a	Y	Pulsed	SinglePulse	low	109	13	96
	2015	EG15_052a	Y	Pulsed	SinglePulse	low	113	7	107
	2015	EG15_052a	Y	Pulsed	SinglePulse	low	120	19	101
	2015	EG15_052a	Y	Pulsed	SinglePulse	low	109	10	99
	2015	EG15_052a	Y	Pulsed	SinglePulse	low	109	12	97
	2015	EG15_052a	Y	Pulsed	SinglePulse	low	97	4	95
	2015	EG15_052a	Y	Pulsed	SinglePulse	low	105	5	102
	2015	EG15_052a	Y	Pulsed	SinglePulse	low	106	9	97
	2015	EG15_052a	Y	Pulsed	SinglePulse	low	113	5	110
	2015	EG15_052a	Y	Pulsed	SinglePulse	low	119	5	116
	2015	EG15_052a	Y	Pulsed	SinglePulse	low	119	11	108
	2015	EG15_052a	Y	Pulsed	SinglePulse	low	112	12	100
	2015	EG15_052a	Y	Pulsed	SinglePulse	low	112	15	97
	2015	EG15_052a	Y	Pulsed	SinglePulse	low	100	7	94
	2015	EG15_052a	Y	Pulsed	SinglePulse	low	105	8	98
	2015	EG15_052a	Y	Pulsed	SinglePulse	low	118	22	96
	2015	EG15_052a	Y	Pulsed	SinglePulse	low	112	7	106
	2016	EG16_025a	N	Pulsed	Gunshot	high	146	22	124
	2016	EG16_025a	N	Tonal	HighTonal	high	148	18	130
	2016	EG16_025a	N	Tonal	Hybrid	high	150	21	129
	2016	EG16_025a	N	Tonal	Hybrid	high	151	27	124
	2016	EG16_025a	N	Tonal	Hybrid	high	150	25	125
	2016	EG16_025a	N	Tonal	Hybrid	high	151	21	130
	2016	EG16_025a	N	Tonal	Upcall	high	149	20	129
	2016	EG16_025a	N	Tonal	Upcall	high	143	16	127
	2016	EG16_025a	N	Tonal	Upcall	high	149	25	124
	2016	EG16_025a	N	Tonal	Upcall	low	120	1	125
	2016	EG16_025a	N	Tonal	Upcall	high	142	22	120
	2016	EG16_025a	N	Tonal	Upcall	high	141	28	113
	2016	EG16_025a	N	Tonal	Upcall	high	139	7	133
	2016	EG16_025a	N	Tonal	Upcall	high	146	24	122
	2016	EG16_025a	N	Tonal	Upcall	high	149	11	138
	2016	EG16_025a	N	Tonal	Upcall	high	145	6	140
	2016	EG16_025a	N	Tonal	Upcall	high	146	6	141
	2016	EG16_025a	N	Tonal	Upcall	high	150	8	143
	2016	EG16_025a	N	Tonal	Upcall	high	149	21	128
	2016	EG16_025a	N	Tonal	Upcall	high	148	10	138
	2016	EG16_025a	N	Tonal	Upcall	high	145	8	138
	2016	EG16_025a	N	Tonal	Upcall	high	148	14	134
	2016	EG16_025a	N	Tonal	Upcall	high	141	14	127
	2016	EG16_025a	N	Tonal	Upcall	high	148	10	138
	2016	EG16_025a	N	Tonal	Upcall	high	149	6	144
	2016	EG16_025a	N	Tonal	Upcall	high	145	13	132
	2016	EG16_025a	N	Tonal	Upcall	high	144	5	141
	2016	EG16_025a	N	Tonal	Upcall	high	148	7	142
	2016	EG16_025a	N	Tonal	Upcall	high	141	2	143
	2016	EG16_025a	N	Tonal	Upcall	high	146	7	140
	2016	EG16_025a	N	Tonal	Upcall	high	146	8	139
	2016	EG16_025a	N	Tonal	Upcall	high	149	6	144
	2016	EG16_025a	N	Tonal	Upcall	high	147	7	141
	2016	EG16_025a	N	Tonal	Upcall	high	148	6	143
	2016	EG16_025a	N	Tonal	Upcall	high	147	6	142
	2016	EG16_025a	N	Tonal	Upcall	high	149	7	143
	2016	EG16_025a	N	Tonal	Upcall	high	147	7	141
	2016	EG16_025a	N	Tonal	Upcall	high	139	3	139
	2016	EG16_025a	N	Tonal	Upcall	high	150	12	138
	2016	EG16_025a	N	Tonal	Upcall	high	144	13	131
	2016	EG16_025a	N	Tonal	Upcall	high	149	7	143
	2016	EG16_025a	N	Tonal	Upcall	high	149	10	139
	2016	EG16_025a	N	Tonal	Upcall	high	150	12	138
	2016	EG16_025a	N	Tonal	Upcall	high	145	9	136
	2016	EG16_025a	N	Pulsed	Pulsive	high	152	11	141
	2016	EG16_025a	N	Pulsed	Pulsive	high	152	10	142
	2016	EG16_030a	Y	Pulsed	DoublePulse	low	120	5	117
	2016	EG16_030a	Y	Pulsed	DoublePulse	low	131	11	120
	2016	EG16_030a	Y	Pulsed	DoublePulse	low	121	3	121
	2016	EG16_030a	Y	Pulsed	DoublePulse	low	124	4	122
	2016	EG16_030a	Y	Pulsed	DoublePulse	low	120	2	122
	2016	EG16_030a	Y	Pulsed	DoublePulse	low	121	2	123
	2016	EG16_030a	Y	Pulsed	DoublePulse	low	130	9	121
	2016	EG16_030a	Y	Pulsed	DoublePulse	low	123	4	121
	2016	EG16_030a	Y	Pulsed	DoublePulse	low	122	5	119
	2016	EG16_030a	Y	Pulsed	DoublePulse	low	118	3	118
	2016	EG16_030a	Y	Pulsed	DoublePulse	low	122	3	122
	2016	EG16_030a	Y	Pulsed	DoublePulse	low	129	4	127
	2016	EG16_030a	Y	Pulsed	DoublePulse	low	115	0	131
	2016	EG16_030a	Y	Pulsed	DoublePulse	low	113	0	129
	2016	EG16_030a	Y	Pulsed	DoublePulse	low	131	5	128
	2016	EG16_030a	Y	Pulsed	DoublePulse	low	127	2	129
	2016	EG16_030a	Y	Pulsed	DoublePulse	low	124	3	124
	2016	EG16_030a	Y	Pulsed	DoublePulse	low	128	6	123
	2016	EG16_030a	Y	Pulsed	DoublePulse	low	130	4	128
	2016	EG16_030a	Y	Pulsed	DoublePulse	low	121	-3	124
	2016	EG16_030a	Y	Pulsed	DoublePulse	low	128	5	125
	2016	EG16_030a	Y	Pulsed	DoublePulse	low	123	3	123
	2016	EG16_030a	Y	Pulsed	DoublePulse	low	125	4	123
	2016	EG16_030a	Y	Pulsed	DoublePulse	low	105	0	121
	2016	EG16_030a	Y	Pulsed	Pulsive	low	124	2	126
	2016	EG16_030a	Y	Pulsed	Pulsive	low	112	0	128
	2016	EG16_030a	Y	Pulsed	Pulsive	low	129	6	124
	2016	EG16_030a	Y	Pulsed	Pulsive	low	124	2	126
	2016	EG16_030a	Y	Pulsed	Pulsive	low	129	6	124
	2016	EG16_030a	Y	Pulsed	Pulsive	low	127	2	129
	2016	EG16_030a	Y	Pulsed	Pulsive	low	125	3	125
	2016	EG16_030a	Y	Pulsed	SinglePulse	low	126	7	120
	2016	EG16_030a	Y	Pulsed	SinglePulse	low	130	11	119
	2016	EG16_030a	Y	Pulsed	SinglePulse	low	125	7	119
	2016	EG16_030a	Y	Pulsed	SinglePulse	low	125	5	122
	2016	EG16_030a	Y	Pulsed	SinglePulse	low	130	8	123
	2016	EG16_030a	Y	Pulsed	SinglePulse	low	123	2	125
	2016	EG16_030a	Y	Pulsed	SinglePulse	low	126	4	124
	2016	EG16_030a	Y	Pulsed	SinglePulse	low	121	2	123
	2016	EG16_030a	Y	Pulsed	SinglePulse	low	125	11	114
	2016	EG16_030a	Y	Pulsed	SinglePulse	low	128	9	119
	2016	EG16_030a	Y	Pulsed	SinglePulse	low	128	17	111
	2016	EG16_030a	Y	Pulsed	SinglePulse	low	124	4	122
	2016	EG16_030a	Y	Pulsed	SinglePulse	low	125	5	122
	2016	EG16_030a	Y	Pulsed	SinglePulse	low	123	3	123
	2016	EG16_030a	Y	Pulsed	SinglePulse	low	126	6	121
	2016	EG16_030a	Y	Pulsed	SinglePulse	high	137	16	121
	2016	EG16_030a	Y	Pulsed	SinglePulse	low	128	7	122
	2016	EG16_030a	Y	Pulsed	SinglePulse	low	126	7	120
	2016	EG16_030a	Y	Pulsed	SinglePulse	low	123	4	121
	2016	EG16_030a	Y	Pulsed	SinglePulse	low	123	4	121
	2016	EG16_030a	Y	Pulsed	SinglePulse	low	129	6	124
	2016	EG16_030a	Y	Pulsed	SinglePulse	high	136	10	126
	2016	EG16_030a	Y	Pulsed	SinglePulse	high	140	12	128
	2016	EG16_030a	Y	Pulsed	SinglePulse	high	146	22	124
	2016	EG16_030a	Y	Pulsed	SinglePulse	low	129	6	124
	2016	EG16_030a	Y	Pulsed	SinglePulse	low	121	4	119
	2016	EG16_030a	Y	Pulsed	SinglePulse	low	125	6	120
	2016	EG16_030a	Y	Pulsed	SinglePulse	low	112	2	114
	2016	EG16_030a	Y	Pulsed	SinglePulse	low	127	5	124
	2016	EG16_030a	Y	Pulsed	SinglePulse	low	114	1	119
	2016	EG16_031a	Y	Pulsed	DoublePulse	high	143	2	145
	2016	EG16_031a	Y	Pulsed	DoublePulse	high	137	1	142
	2016	EG16_031a	Y	Pulsed	DoublePulse	high	140	2	142
	2016	EG16_031a	Y	Pulsed	DoublePulse	high	140	3	140
	2016	EG16_031a	Y	Pulsed	DoublePulse	high	135	2	137
	2016	EG16_031a	Y	Pulsed	DoublePulse	high	134	2	136
	2016	EG16_031a	Y	Pulsed	DoublePulse	high	132	1	137
	2016	EG16_031a	Y	Pulsed	DoublePulse	low	116	0	132
	2016	EG16_031a	Y	Pulsed	DoublePulse	low	119	0	135
	2016	EG16_031a	Y	Pulsed	DoublePulse	low	130	1	135
	2016	EG16_031a	Y	Pulsed	DoublePulse	high	134	2	136
	2016	EG16_031a	Y	Pulsed	Pulsive	high	135	3	135
	2016	EG16_031a	Y	Pulsed	Pulsive	high	134	4	132
	2016	EG16_031a	Y	Pulsed	Pulsive	high	137	9	128
	2016	EG16_031a	Y	Pulsed	Pulsive	low	126	4	124
	2016	EG16_031a	Y	Pulsed	Pulsive	low	127	6	122
	2016	EG16_031a	Y	Pulsed	Pulsive	low	125	5	122
	2016	EG16_031a	Y	Pulsed	Pulsive	low	122	3	122
	2016	EG16_031a	Y	Pulsed	SinglePulse	low	126	3	126
	2016	EG16_031a	Y	Pulsed	SinglePulse	low	120	8	113
	2016	EG16_031a	Y	Pulsed	SinglePulse	low	125	9	116
	2016	EG16_031a	Y	Pulsed	SinglePulse	high	133	4	131
	2016	EG16_031a	Y	Pulsed	SinglePulse	low	117	0	133
	2016	EG16_031a	Y	Pulsed	SinglePulse	low	124	1	129
	2016	EG16_031a	Y	Pulsed	SinglePulse	low	129	7	123
	2016	EG16_031a	Y	Pulsed	SinglePulse	low	122	13	109
	2016	EG16_031a	Y	Pulsed	SinglePulse	low	115	2	117
	2016	EG16_031a	Y	Pulsed	SinglePulse	low	112	5	109
	2016	EG16_031a	Y	Pulsed	SinglePulse	low	117	2	119
	2016	EG16_031a	Y	Pulsed	SinglePulse	low	126	4	124
	2016	EG16_031a	Y	Pulsed	SinglePulse	low	121	3	121
	2016	EG16_031a	Y	Pulsed	SinglePulse	low	127	7	121
	2016	EG16_031a	Y	Pulsed	SinglePulse	low	119	6	114
	2016	EG16_031a	Y	Pulsed	SinglePulse	low	108	1	113
	2016	EG16_031a	Y	Pulsed	SinglePulse	low	120	3	120
	2016	EG16_031a	Y	Pulsed	SinglePulse	low	119	2	121
	2016	EG16_031a	Y	Pulsed	SinglePulse	low	121	3	121
	2016	EG16_031a	Y	Pulsed	SinglePulse	low	117	1	122
	2016	EG16_031a	Y	Pulsed	SinglePulse	low	105	0	121
	2016	EG16_031a	Y	Pulsed	SinglePulse	low	126	10	116
	2016	EG16_031a	Y	Pulsed	SinglePulse	low	122	2	124
	2016	EG16_031a	Y	Pulsed	SinglePulse	low	123	3	123
	2016	EG16_031a	Y	Pulsed	SinglePulse	low	106	0	122
	2016	EG16_031a	Y	Pulsed	SinglePulse	low	114	1	119
	2016	EG16_031a	Y	Pulsed	SinglePulse	low	114	14	100
	2016	EG16_031a	Y	Pulsed	SinglePulse	low	117	0	133
	2016	EG16_031a	Y	Pulsed	SinglePulse	low	128	4	126
	2016	EG16_031a	Y	Pulsed	SinglePulse	low	124	3	124
	2016	EG16_031a	Y	Pulsed	SinglePulse	low	115	3	115
	2016	EG16_031a	Y	Pulsed	SinglePulse	low	127	7	121
	2016	EG16_031a	Y	Pulsed	SinglePulse	low	122	2	124
	2016	EG16_031a	Y	Pulsed	SinglePulse	low	114	1	119
	2016	EG16_031a	Y	Pulsed	SinglePulse	low	118	4	116
	2016	EG16_031a	Y	Pulsed	SinglePulse	low	130	14	116
	2016	EG16_031a	Y	Pulsed	SinglePulse	low	128	12	116
	2016	EG16_031a	Y	Pulsed	SinglePulse	low	126	8	119
	2016	EG16_031a	Y	Pulsed	SinglePulse	low	119	3	119
	2016	EG16_031a	Y	Pulsed	SinglePulse	low	117	12	105
	2016	EG16_031a	Y	Pulsed	SinglePulse	low	124	23	101
	2016	EG16_048a	Y	Tonal	LowTonal	low	123	8	116
	2016	EG16_048a	Y	Tonal	LowTonal	low	119	4	117
	2016	EG16_048a	Y	Calf	Calf	low	119	3	119
	2016	EG16_048a	Y	Calf	Calf	high	132	15	117
	2016	EG16_048a	Y	Calf	Calf	low	119	19	100
	2016	EG16_048a	Y	Calf	Calf	low	117	15	102
	2016	EG16_048a	Y	Calf	Calf	low	131	14	117
	2016	EG16_048a	Y	Calf	Calf	low	130	10	120
	2016	EG16_048a	Y	Pulsed	DoublePulse	low	123	2	125
	2016	EG16_048a	Y	Pulsed	DoublePulse	low	129	5	126
	2016	EG16_048a	Y	Pulsed	DoublePulse	high	138	14	124
	2016	EG16_048a	Y	Pulsed	DoublePulse	high	136	2	138
	2016	EG16_048a	Y	Pulsed	DoublePulse	low	123	2	125
	2016	EG16_048a	Y	Pulsed	Pulsive	high	133	17	116
	2016	EG16_048a	Y	Pulsed	Pulsive	low	121	4	119
	2016	EG16_048a	Y	Pulsed	Pulsive	high	133	9	124
	2016	EG16_048a	Y	Pulsed	Pulsive	low	129	9	120
	2016	EG16_048a	Y	Pulsed	Pulsive	low	125	2	127
	2016	EG16_048a	Y	Pulsed	Pulsive	low	129	3	129
	2016	EG16_048a	Y	Pulsed	Pulsive	high	136	11	125
	2016	EG16_048a	Y	Pulsed	Pulsive	low	126	10	116
	2016	EG16_048a	Y	Pulsed	Pulsive	low	126	12	114
	2016	EG16_048a	Y	Pulsed	Pulsive	low	121	9	112
	2016	EG16_048a	Y	Pulsed	Pulsive	high	135	13	122
	2016	EG16_048a	Y	Pulsed	Pulsive	high	139	21	118
	2016	EG16_048a	Y	Pulsed	Pulsive	low	122	11	111
	2016	EG16_048a	Y	Pulsed	Pulsive	low	131	24	107
	2016	EG16_048a	Y	Pulsed	Pulsive	low	122	8	115
	2016	EG16_048a	Y	Pulsed	Pulsive	low	130	11	119
	2016	EG16_048a	Y	Pulsed	Pulsive	high	135	32	103
	2016	EG16_048a	Y	Pulsed	Pulsive	low	122	19	103
	2016	EG16_048a	Y	Pulsed	Pulsive	low	122	3	122
	2016	EG16_048a	Y	Pulsed	Pulsive	low	118	13	105
	2016	EG16_048a	Y	Pulsed	Pulsive	low	123	24	99
	2016	EG16_048a	Y	Pulsed	Pulsive	low	125	24	101
	2016	EG16_048a	Y	Pulsed	Pulsive	low	123	16	107
	2016	EG16_048a	Y	Pulsed	Pulsive	low	109	5	106
	2016	EG16_048a	Y	Pulsed	Pulsive	low	119	11	108
	2016	EG16_048a	Y	Pulsed	Pulsive	low	131	27	104
	2016	EG16_048a	Y	Pulsed	Pulsive	low	129	28	101
	2016	EG16_048a	Y	Pulsed	Pulsive	low	120	17	103
	2016	EG16_048a	Y	Pulsed	Pulsive	low	122	14	108
	2016	EG16_048a	Y	Pulsed	Pulsive	low	124	19	105
	2016	EG16_048a	Y	Pulsed	Pulsive	low	109	7	103
	2016	EG16_048a	Y	Pulsed	Pulsive	low	111	12	99
	2016	EG16_048a	Y	Pulsed	Pulsive	low	130	27	103
	2016	EG16_048a	Y	Pulsed	Pulsive	low	112	9	103
	2016	EG16_048a	Y	Pulsed	Pulsive	high	134	26	108
	2016	EG16_048a	Y	Pulsed	Pulsive	low	130	23	107
	2016	EG16_048a	Y	Pulsed	Pulsive	low	119	11	108
	2016	EG16_048a	Y	Pulsed	Pulsive	low	131	26	105
	2016	EG16_048a	Y	Pulsed	Pulsive	low	120	20	100
	2016	EG16_048a	Y	Pulsed	Pulsive	low	122	21	101
	2016	EG16_048a	Y	Pulsed	Pulsive	low	120	14	106
	2016	EG16_048a	Y	Pulsed	Pulsive	low	115	12	103
	2016	EG16_048a	Y	Pulsed	Pulsive	low	122	14	108
	2016	EG16_048a	Y	Pulsed	Pulsive	low	121	12	109
	2016	EG16_048a	Y	Pulsed	Pulsive	low	116	10	106
	2016	EG16_048a	Y	Pulsed	Pulsive	low	112	11	101
	2016	EG16_048a	Y	Pulsed	Pulsive	low	112	13	99
	2016	EG16_048a	Y	Pulsed	Pulsive	low	114	7	108
	2016	EG16_048a	Y	Pulsed	Pulsive	low	119	17	102
	2016	EG16_048a	Y	Pulsed	Pulsive	low	115	16	99
	2016	EG16_048a	Y	Pulsed	Pulsive	low	130	29	101
	2016	EG16_048a	Y	Pulsed	Pulsive	low	122	15	107
	2016	EG16_048a	Y	Pulsed	Pulsive	low	129	23	106
	2016	EG16_048a	Y	Pulsed	Pulsive	low	121	14	107
	2016	EG16_048a	Y	Pulsed	Pulsive	low	122	22	100
	2016	EG16_048a	Y	Pulsed	Pulsive	low	122	21	101
	2016	EG16_048a	Y	Pulsed	Pulsive	low	128	28	100
	2016	EG16_048a	Y	Pulsed	Pulsive	low	124	19	105
	2016	EG16_048a	Y	Pulsed	Pulsive	low	122	15	107
	2016	EG16_048a	Y	Pulsed	Pulsive	low	119	20	99
	2016	EG16_048a	Y	Pulsed	Pulsive	low	115	8	108
	2016	EG16_048a	Y	Pulsed	Pulsive	low	120	20	100
	2016	EG16_048a	Y	Pulsed	Pulsive	low	117	13	104
	2016	EG16_048a	Y	Pulsed	Pulsive	low	124	25	99
	2016	EG16_048a	Y	Pulsed	Pulsive	low	123	25	98
	2016	EG16_048a	Y	Pulsed	Pulsive	high	136	21	115
	2016	EG16_048a	Y	Pulsed	Pulsive	low	120	18	102
	2016	EG16_048a	Y	Pulsed	Pulsive	low	118	17	101
	2016	EG16_048a	Y	Pulsed	Pulsive	low	123	23	100
	2016	EG16_048a	Y	Pulsed	Pulsive	low	115	16	99
	2016	EG16_048a	Y	Pulsed	Pulsive	low	116	14	102
	2016	EG16_048a	Y	Pulsed	Pulsive	low	117	12	105
	2016	EG16_048a	Y	Pulsed	Pulsive	low	117	8	110
	2016	EG16_048a	Y	Pulsed	Pulsive	low	114	16	98
	2016	EG16_048a	Y	Pulsed	Pulsive	low	119	20	99
	2016	EG16_048a	Y	Pulsed	SinglePulse	low	123	24	99
	2016	EG16_048a	Y	Pulsed	SinglePulse	low	113	5	110
	2016	EG16_048a	Y	Pulsed	SinglePulse	low	123	12	111
	2016	EG16_048a	Y	Pulsed	SinglePulse	low	124	15	109
	2016	EG16_048a	Y	Pulsed	SinglePulse	low	121	12	109
	2016	EG16_048a	Y	Pulsed	SinglePulse	low	123	6	118
	2016	EG16_048a	Y	Pulsed	SinglePulse	low	124	8	117
	2016	EG16_048a	Y	Pulsed	SinglePulse	high	133	20	113
	2016	EG16_048a	Y	Pulsed	SinglePulse	high	135	23	112
	2016	EG16_048a	Y	Pulsed	SinglePulse	high	132	28	104
	2016	EG16_048a	Y	Pulsed	SinglePulse	high	134	24	110
	2016	EG16_048a	Y	Pulsed	SinglePulse	high	133	14	119
	2016	EG16_048a	Y	Pulsed	SinglePulse	low	120	9	111
	2016	EG16_048a	Y	Pulsed	SinglePulse	low	126	17	109
	2016	EG16_048a	Y	Pulsed	SinglePulse	low	119	9	110
	2016	EG16_048a	Y	Pulsed	SinglePulse	low	117	7	111
	2016	EG16_048a	Y	Pulsed	SinglePulse	low	124	5	121
	2016	EG16_048a	Y	Pulsed	SinglePulse	low	121	3	121
	2016	EG16_048a	Y	Pulsed	SinglePulse	low	116	10	106
	2016	EG16_048a	Y	Pulsed	SinglePulse	low	115	11	104
	2016	EG16_048a	Y	Pulsed	SinglePulse	low	126	21	105
	2016	EG16_048a	Y	Pulsed	SinglePulse	low	117	8	110
	2016	EG16_048a	Y	Pulsed	SinglePulse	low	121	4	119
	2016	EG16_048a	Y	Pulsed	SinglePulse	low	115	6	110
	2016	EG16_048a	Y	Pulsed	SinglePulse	low	115	7	109
	2016	EG16_048a	Y	Pulsed	SinglePulse	low	125	20	105
	2016	EG16_048a	Y	Pulsed	SinglePulse	low	128	21	107
	2016	EG16_048a	Y	Pulsed	SinglePulse	low	128	29	99
	2016	EG16_048a	Y	Pulsed	SinglePulse	low	119	14	105
	2016	EG16_048a	Y	Pulsed	SinglePulse	low	114	14	100
	2016	EG16_048a	Y	Pulsed	SinglePulse	low	122	10	112
	2016	EG16_048a	Y	Pulsed	SinglePulse	low	121	12	109
	2016	EG16_048a	Y	Pulsed	SinglePulse	low	120	3	120
	2016	EG16_048a	Y	Pulsed	SinglePulse	low	122	23	99
	2016	EG16_048a	Y	Pulsed	SinglePulse	low	127	29	98
	2016	EG16_048a	Y	Pulsed	SinglePulse	low	126	16	110
	2016	EG16_048a	Y	Pulsed	SinglePulse	low	115	14	101
	2016	EG16_048a	Y	Pulsed	SinglePulse	low	122	21	101
	2016	EG16_048b	Y	Tonal	LowTonal	low	123	15	108
	2016	EG16_048b	Y	Tonal	LowTonal	low	127	19	108
	2016	EG16_048b	Y	Tonal	Upcall	low	127	15	112
	2016	EG16_048b	Y	Tonal	Upcall	high	133	22	111
	2016	EG16_048b	Y	Calf	Calf	low	123	5	120
	2016	EG16_048b	Y	Pulsed	DoublePulse	low	124	5	121
	2016	EG16_048b	Y	Pulsed	DoublePulse	low	117	2	119
	2016	EG16_048b	Y	Pulsed	DoublePulse	low	118	10	108
	2016	EG16_048b	Y	Pulsed	DoublePulse	low	114	7	108
	2016	EG16_048b	Y	Pulsed	DoublePulse	low	113	6	108
	2016	EG16_048b	Y	Pulsed	DoublePulse	low	112	6	107
	2016	EG16_048b	Y	Pulsed	DoublePulse	low	122	15	107
	2016	EG16_048b	Y	Pulsed	DoublePulse	low	118	10	108
	2016	EG16_048b	Y	Pulsed	DoublePulse	low	119	13	106
	2016	EG16_048b	Y	Pulsed	DoublePulse	low	116	9	107
	2016	EG16_048b	Y	Pulsed	DoublePulse	low	112	5	109
	2016	EG16_048b	Y	Pulsed	DoublePulse	low	122	14	108
	2016	EG16_048b	Y	Pulsed	DoublePulse	low	130	17	113
	2016	EG16_048b	Y	Pulsed	DoublePulse	low	120	6	115
	2016	EG16_048b	Y	Pulsed	Pulsive	high	139	22	117
	2016	EG16_048b	Y	Pulsed	SinglePulse	low	124	6	119
	2016	EG16_048b	Y	Pulsed	SinglePulse	high	137	30	107
	2016	EG16_048b	Y	Pulsed	SinglePulse	high	137	32	105
	2016	EG16_048b	Y	Pulsed	SinglePulse	high	135	29	106
	2016	EG16_048b	Y	Pulsed	SinglePulse	low	101	0	117
	2016	EG16_048b	Y	Pulsed	SinglePulse	low	118	3	118
	2016	EG16_048b	Y	Pulsed	SinglePulse	low	126	21	105
	2016	EG16_048b	Y	Pulsed	SinglePulse	low	123	20	103
	2016	EG16_048b	Y	Pulsed	SinglePulse	low	125	19	106
	2016	EG16_048b	Y	Pulsed	SinglePulse	low	127	23	104
	2016	EG16_048b	Y	Pulsed	SinglePulse	low	127	20	107
	2016	EG16_048b	Y	Pulsed	SinglePulse	low	123	19	104
	2016	EG16_048b	Y	Pulsed	SinglePulse	low	122	16	106
	2016	EG16_048b	Y	Pulsed	SinglePulse	low	120	16	104
	2016	EG16_048b	Y	Pulsed	SinglePulse	low	122	15	107
	2016	EG16_048b	Y	Pulsed	SinglePulse	low	113	9	104
	2016	EG16_048b	Y	Pulsed	SinglePulse	low	123	19	104
	2016	EG16_048b	Y	Pulsed	SinglePulse	low	121	15	106
	2016	EG16_048b	Y	Pulsed	SinglePulse	low	116	13	103
	2016	EG16_048b	Y	Pulsed	SinglePulse	low	118	13	105
	2016	EG16_048b	Y	Pulsed	SinglePulse	low	122	20	102
	2016	EG16_048b	Y	Pulsed	SinglePulse	low	120	15	105
	2016	EG16_048b	Y	Pulsed	SinglePulse	low	120	15	105
	2016	EG16_048b	Y	Pulsed	SinglePulse	low	128	15	113
	2016	EG16_048b	Y	Pulsed	SinglePulse	low	130	22	108
	2016	EG16_048b	Y	Pulsed	SinglePulse	low	131	15	116
	2016	EG16_048b	Y	Pulsed	SinglePulse	low	124	14	110
	2016	EG16_048b	Y	Pulsed	SinglePulse	low	127	20	107
	2016	EG16_048b	Y	Pulsed	SinglePulse	low	129	18	111
	2016	EG16_048b	Y	Pulsed	SinglePulse	high	133	26	107
	2016	EG16_048b	Y	Pulsed	SinglePulse	low	129	25	104
	2016	EG16_048b	Y	Pulsed	SinglePulse	high	135	21	114
	2016	EG16_048b	Y	Pulsed	SinglePulse	high	134	22	112
	2016	EG16_053a	Y	Pulsed	Gunshot	low	126	16	110
	2016	EG16_053a	Y	Pulsed	Gunshot	low	117	5	114
	2016	EG16_053a	Y	Calf	Calf	low	121	15	106
	2016	EG16_053a	Y	Calf	Calf	high	137	34	103
	2016	EG16_053a	Y	Calf	Calf	low	106	5	103
	2016	EG16_053a	Y	Calf	Calf	high	132	7	126
	2016	EG16_053a	Y	Calf	Calf	high	138	17	121
	2016	EG16_053a	Y	Calf	Calf	high	138	15	123
	2016	EG16_053a	Y	Calf	Calf	low	131	12	119
	2016	EG16_053a	Y	Pulsed	DoublePulse	low	129	19	110
	2016	EG16_053a	Y	Pulsed	DoublePulse	low	124	14	110
	2016	EG16_053a	Y	Pulsed	DoublePulse	low	104	0	120
	2016	EG16_053a	Y	Pulsed	DoublePulse	low	125	3	125
	2016	EG16_053a	Y	Pulsed	DoublePulse	low	121	2	123
	2016	EG16_053a	Y	Pulsed	DoublePulse	low	118	2	120
	2016	EG16_053a	Y	Pulsed	DoublePulse	low	124	9	115
	2016	EG16_053a	Y	Pulsed	DoublePulse	low	117	3	117
	2016	EG16_053a	Y	Pulsed	DoublePulse	low	124	5	121
	2016	EG16_053a	Y	Pulsed	DoublePulse	low	110	5	107
	2016	EG16_053a	Y	Pulsed	Pulsive	low	113	6	108
	2016	EG16_053a	Y	Pulsed	Pulsive	low	116	10	106
	2016	EG16_053a	Y	Pulsed	Pulsive	low	108	5	105
	2016	EG16_053a	Y	Pulsed	Pulsive	low	116	5	113
	2016	EG16_053a	Y	Pulsed	Pulsive	high	134	22	112
	2016	EG16_053a	Y	Pulsed	Pulsive	low	121	6	116
	2016	EG16_053a	Y	Pulsed	Pulsive	low	121	11	110
	2016	EG16_053a	Y	Pulsed	Pulsive	low	114	5	111
	2016	EG16_053a	Y	Pulsed	Pulsive	low	114	7	108
	2016	EG16_053a	Y	Pulsed	Pulsive	low	118	11	107
	2016	EG16_053a	Y	Pulsed	Pulsive	low	103	7	97
	2016	EG16_053a	Y	Pulsed	Pulsive	low	107	11	96
	2016	EG16_053a	Y	Pulsed	SinglePulse	low	94	2	96
	2016	EG16_053a	Y	Pulsed	SinglePulse	low	108	8	101
	2016	EG16_053a	Y	Pulsed	SinglePulse	low	113	11	102
	2016	EG16_053a	Y	Pulsed	SinglePulse	low	87	0	103
	2016	EG16_053a	Y	Pulsed	SinglePulse	low	103	8	96
	2016	EG16_053a	Y	Pulsed	SinglePulse	low	123	19	104
	2016	EG16_053a	Y	Pulsed	SinglePulse	low	121	16	105
	2016	EG16_053a	Y	Pulsed	SinglePulse	low	106	4	104
	2016	EG16_053a	Y	Pulsed	SinglePulse	low	118	13	105
	2016	EG16_053a	Y	Pulsed	SinglePulse	low	116	9	107
	2016	EG16_053a	Y	Pulsed	SinglePulse	low	119	17	102
	2016	EG16_053a	Y	Pulsed	SinglePulse	low	110	13	97
	2016	EG16_053a	Y	Pulsed	SinglePulse	low	125	28	97
	2016	EG16_053a	Y	Pulsed	SinglePulse	low	117	18	99
	2016	EG16_053a	Y	Pulsed	SinglePulse	low	122	24	98
	2016	EG16_053a	Y	Pulsed	SinglePulse	low	117	18	99
	2016	EG16_053a	Y	Pulsed	SinglePulse	low	114	15	99
	2016	EG16_053a	Y	Pulsed	SinglePulse	low	120	22	98
	2016	EG16_053a	Y	Pulsed	SinglePulse	low	131	32	99
	2016	EG16_053a	Y	Pulsed	SinglePulse	low	131	33	98
	2016	EG16_053a	Y	Pulsed	SinglePulse	low	121	22	99
	2016	EG16_053a	Y	Pulsed	SinglePulse	low	126	28	98
	2016	EG16_053a	Y	Pulsed	SinglePulse	low	112	15	97
	2016	EG16_053a	Y	Pulsed	SinglePulse	low	116	11	105
	2016	EG16_053a	Y	Pulsed	SinglePulse	high	137	39	98
	2016	EG16_053a	Y	Pulsed	SinglePulse	high	134	28	106
	2016	EG16_053a	Y	Pulsed	SinglePulse	low	115	14	101
	2016	EG16_053a	Y	Pulsed	SinglePulse	low	116	12	104
	2016	EG16_053a	Y	Pulsed	SinglePulse	low	104	3	104
	2016	EG16_053a	Y	Pulsed	SinglePulse	low	128	19	109
	2016	EG16_053a	Y	Pulsed	SinglePulse	low	111	3	111
	2016	EG16_053a	Y	Pulsed	SinglePulse	low	124	17	107
	2016	EG16_053a	Y	Pulsed	SinglePulse	low	123	19	104
	2016	EG16_053a	Y	Pulsed	SinglePulse	low	117	16	101
	2016	EG16_053a	Y	Pulsed	SinglePulse	low	112	5	109
	2016	EG16_053a	Y	Pulsed	SinglePulse	low	109	3	109
	2016	EG16_053a	Y	Pulsed	SinglePulse	low	125	8	118
	2016	EG16_053a	Y	Pulsed	SinglePulse	low	111	1	116
	2016	EG16_053a	Y	Pulsed	SinglePulse	low	118	3	118
	2016	EG16_053a	Y	Pulsed	SinglePulse	low	117	3	117
	2016	EG16_053a	Y	Pulsed	SinglePulse	low	119	7	113
	2016	EG16_053a	Y	Pulsed	SinglePulse	low	121	10	111
